# Supplementary material for: The Persistence of Hepatitis C Virus Infection in Hepatocytes Promotes Hepatocellular Carcinoma Progression by Pro-Inflammatory Interluekin-8 Expression
Source: MDPI journal article supplement (doi:10.3390/biomedicines9101446), 2021-10-11
Supplement: s1 [file s1]

## Supplementary Figures:

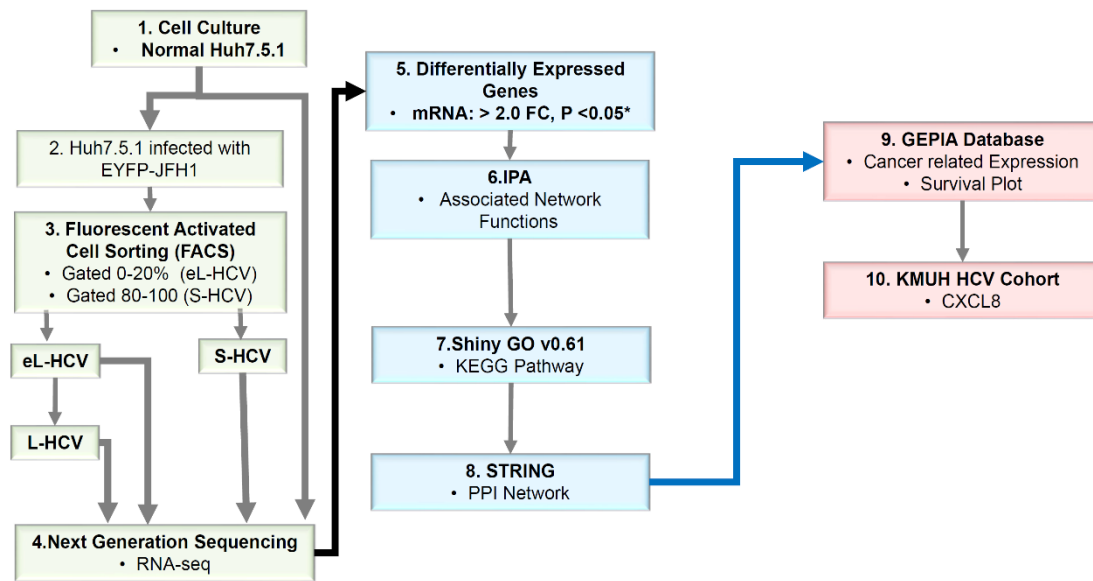

**Supplementary Figure S1. Flow Chart Study Design.** Human hepatoma 7.5.1 (Huh 751) were cultured and infected with JFH1-EYFP for five days and distinguished by fluorescence activated cell sorting (FACS) set to 0%-20% low intensity for low viral load and 80%-100% for high intensity for high viral load. Low viral load cells were continuously passaged, cultured and sorted on day 30 to establish long-term HCV (L-HCV) cells. Uninfected Huh7.5.1, S-HCV, eL-HCV and L-HCV were harvested for RNA sequencing and expression profiling. The differentially expressed genes with fold change > 2.0 and statistical significance  $p < 0.05^*$  were selected for enrichment analyses using different bioinformatics resources. Finally, L-HCV candidate genes were searched for in Gene Expression Profiling Interactive Analysis (GEPIA) to observe their expression in different cancers.

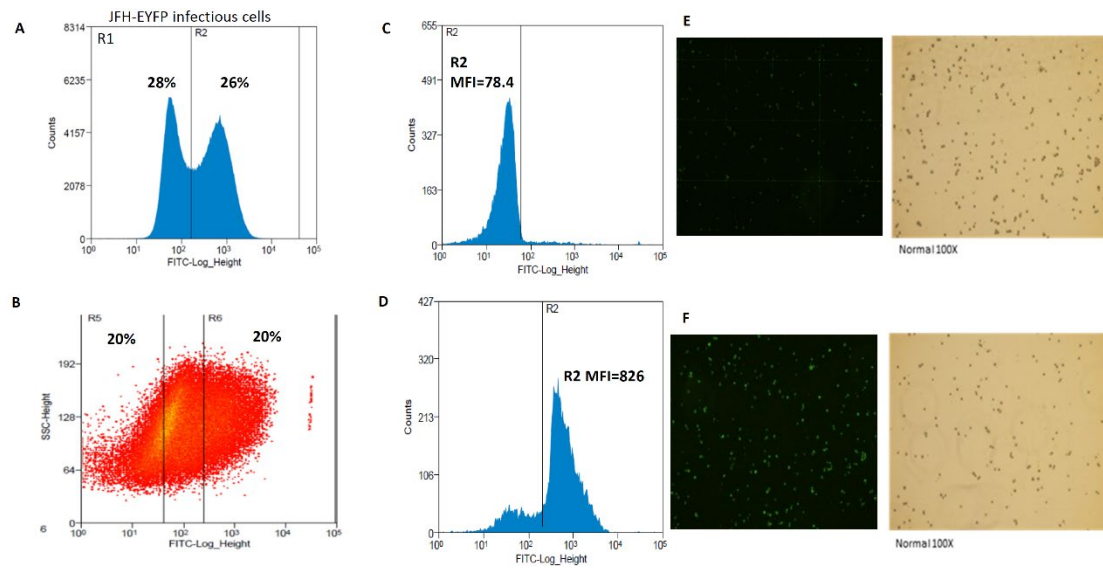

**Supplementary Figure S2. Distinguishing Intracellular HCV infectious cells.** (A) A histogram of total JFH-EYFP infectious cells by fluorescence activated cell sorting (FACS). (B) Scatter plot by FACS showing infectious population. The cells were gated at 20% (0%-20%) for low viral load and (80%-100%) for high viral load. (C) The mean fluorescence intensity (MFI) =78 for low viral load. Low viral load populations demonstrated very low fluorescence levels. (D) The mean fluorescence intensity (MFI) =82.6 for high viral load. High viral load populations demonstrated high fluorescence levels.

# Timeline

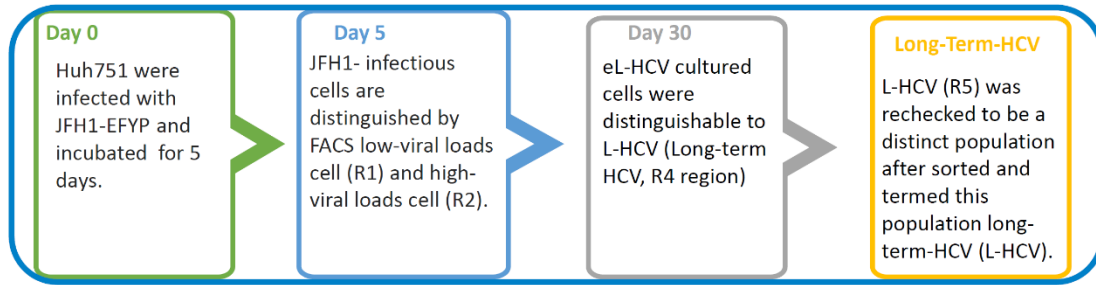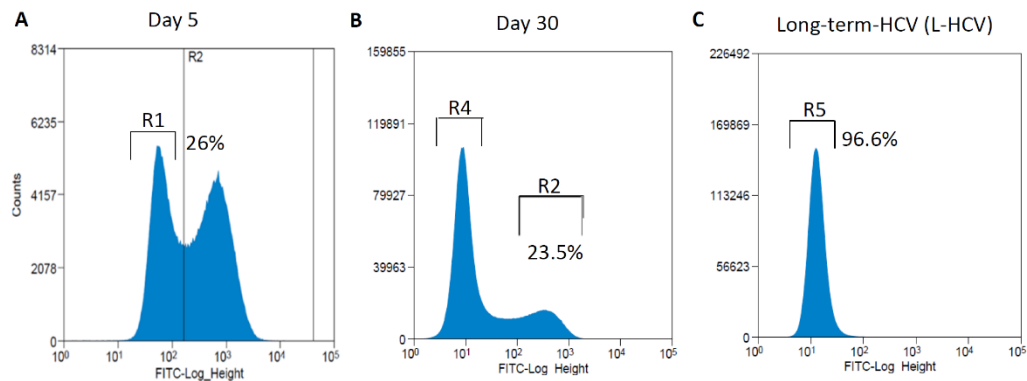

**Supplementary Figure S3. Establishing long-term HCV (L-HCV) cells.** (A) A histogram on day 5 of total infectious cell to obtain low viral load cells (R2 region, 26% of total infections cells) referred to as early long-term HCV (eL-HCV). (B) A histogram on day 30 of day 5 derived eL-HCV cells showing an increase of low viral load cells (R4 region) and a decreased of high viral load cells (R2 region, 23.5%) by FACS. (D) A histogram of low viral load cells (R4 region) on day 30 after sorting and confirmed to be low viral load referred to as long-term HCV (L-HCV) showing 96.6 % isolation efficiency of L-HCV cells.

## **Supplementary Methods:**

### **Data analysis tools:**

Ingenuity Pathway Analysis (IPA) software (Ingenuity Systems Inc., Redwood City, CA, USA) allows for the “Core Analysis” of a set of genes of interest, based on integrated literature searches that already exist and are constantly updated. GenCLiP 3 is a web server and is updated version of GenCLiP 2.0 analysis of human gene functions and regulatory networks. It provides accurate recognition of molecular interactions with polarity and directionality from PubMed database. It is available at: <http://ci.smu.edu.cn/genclip3/>. ShinyGO is an intuitive and graphical web application that allows to understand a gene list through integration of gene ontology (GO) enrichment analysis as KEGG. It is available at: <http://bioinformatics.sdstate.edu/go/>. The Search Tool for the Retrieval of Interacting Genes (STRING) database (version 11) contains analysis and combines protein-protein interactions (PPI), either direct or indirect, interactions while focusing on functional association. Gene Expression Profiling Interactive Analysis (GEPIA) is a customizable and interactive tool with functions such as differential expression analysis and patient survival analysis. GEPIA is available at: <http://gepia.cancer-pku.cn/>.

Supplementary Table S1. The primer sequences of genes for Real-time PCR.

| Primers      | Sequence              |
|--------------|-----------------------|
| CTNNB1_F     | CCCACTAATGTCCAGCGTTT  |
| CTNNB1_R     | AACGCATGATAGCGTGTCTG  |
| CEBPD_mRNA_F | AGCGCAACAACATCGCCGTG  |
| CEBPD_mRNA_R | GTCGGGTCTGAGGTATGGGTC |
| EDN1_mRNA_F  | AGCTGTCCAAGTCAGACGC   |
| EDN1_mRNA_R  | GCCCAAGTGCCCTTTTAACG  |
| GAPDH_F      | GAAGGTGAAGGTCGGAGT    |
| GAPDH_R      | GAAGATGGTGATGGGATTTC  |

Supplementary Table S2. The the Fold change (FC)  $\geq -2$  or  $\leq 2$  of NGS mRNA expression in S-HCV, eL-HCV, and L-HCV cells.

| Groups        | FC $\geq -2$   | FC $\geq 2$   |               |
|---------------|----------------|---------------|---------------|
| <b>S-HCV</b>  | LINC00504      | ELF3          | DDIT4         |
|               | MIR17HG        | OXA1L         | SHC2          |
|               | SPP2           | HSPB1         | BTG2          |
|               | MT-ND2         | PPARGC1A      | UBALD2        |
|               | UGT8           | HS1BP3        | JUNB          |
|               | AC092669.3     | CTB-147N14.6  | SCARNA9       |
|               | AL109927.1     | BHLHE40       | KIF5C         |
|               | TBC1D8B        | MAFF          | UAP1L1        |
|               | NBPF9          | PATL1         | RELB          |
|               | ATP9B          | SULT1C4       | CREB5         |
|               | RP11-703G6.1   | MRAS          | NFKB2         |
|               | CYP3A5         | DUSP10        | KLF6          |
|               | MT-ND1         | NFKBIE        | TRIB3         |
|               | WDPCP          | RNASEK        | GTPBP2        |
|               |                | UCA1          | PTPRH         |
|               |                | BBC3          | RASD1         |
|               |                |               | RP11-108M9.4  |
| <b>eL-HCV</b> | PVT1           | PTMS          | SERPIND1      |
|               | FOSB           | RP11-187E13.1 | CH17-270A2.2  |
|               | CYSLTR1        | FAM134B       | RP11-692C24.2 |
|               | ARG1           | SLC38A3       | IGF2          |
|               |                | KIAA0195      |               |
| <b>L-HCV</b>  | HIST1H2BM      | AFP           | OPTN          |
|               | HIST1H2AE      | RCN1          | JDP2          |
|               | HIST1H2BB      | HSBP1L1       | VTN           |
|               | HIST1H1A       | SPINK1        | PARP9         |
|               | HIST1H2AH      | KRT23         | CAV1          |
|               | HIST3H2A       | C1orf35       | TMEM69        |
|               | HIST1H3A       | NUB1          | ADPRHL1       |
|               | HIST1H2AD      | SNAP29        | SKAP2         |
|               | HIST1H2AM      | CRTAP         | RFPL4B        |
|               | HIST1H1B       | PDCD4         | C6orf52       |
|               | HIST1H2AB      | SLC3A2        | CDH2          |
|               | RP11-148B6.1   | CTNND2        | RP11-59D5_B.2 |
|               | RP11-468E2.2   | SMAGP         | CTC-246B18.10 |
|               | HIST1H2BO      | LASP1         | RP9           |
|               | APOA1-AS       | RWDD3         | KCNQ2         |
|               | RP11-1151B14.3 | C9orf72       | SEMA3C        |
|               | IFT122         | VPS13C        | SPATA20       |
|               | HIST2H3D       | EIF4EBP1      | CD9           |
|               | SARDH          | IMMP1L        | SPSB1         |
|               | HIST1H2BJ      | MED10         | ABCA7         |
|               | HIST2H2BE      | DHRS3         | MOSPD1        |
|               | MVD            | GABARAP       | PPP1R1C       |
|               | ETV1           | MYO1D         | TNFAIP2       |
|               | HIST1H2AK      | WDR53         | BLVRA         |
|               | CCR6           | NSUN5         | PMAIP1        |
|               | ADAMTS12       | LRRC42        | THG1L         |
|               | HIST2H2AA4     | ZNF559-ZNF177 | APOC3         |
|               |                | MYO5B         | MT1E          |

| Groups | FC $\geq -2$ | FC $\geq 2$  |
|--------|--------------|--------------|
| L-HCV  |              | HMOX1        |
|        |              | MPP1         |
|        |              | UBD          |
|        |              | ESPN         |
|        |              | ZNF528       |
|        |              | EPCAM        |
|        |              | FZD6         |
|        |              | GPX2         |
|        |              | TFF3         |
|        |              | SPX          |
|        |              | FBN1         |
|        |              | AJUBA        |
|        |              | CAPN2        |
|        |              | TMEM154      |
|        |              | AKR1D1       |
|        |              | TRAPPC2B     |
|        |              | MARVELD3     |
|        |              | TINAGL1      |
|        |              | SLC44A3      |
|        |              | C4BPB        |
|        |              | HLA-E        |
|        |              | SRC          |
|        |              | BMF          |
|        |              | ANXA1        |
|        |              | ELOVL7       |
|        |              | FAM47E-STBD1 |
|        |              | GJD3         |
|        |              | STX1A        |
|        |              | STX3         |
|        |              | UPF3B        |
|        |              | MDK          |
|        |              | ICA1         |
|        |              | CLRN3        |
|        |              | RP11-689K5.3 |
|        |              | CHMP4C       |
|        |              | FSTL1        |
|        |              | GUCY2C       |
|        |              | FZD5         |
|        |              | SAT1         |
|        |              | CYP1A1       |
|        |              | GPHN         |
|        |              | AC084809.2   |
|        |              | OCLN         |
|        |              | DOCK11       |
|        |              | IL32         |
|        |              | RAB37        |
|        |              | MT1F         |
|        |              | EDIL3        |
|        |              | EDN1         |
|        |              | FAM50A       |
|        |              | LIMA1        |
|        |              | HYI          |
|        |              | CXCL1        |
|        |              | PPP1R14A     |
|        |              | CDH17        |
|        |              | TMEM45B      |
|        |              | NPNT         |
|        |              | TSC22D3      |
|        |              | TRIM31       |
|        |              | RASGEF1B     |
|        |              | NTN4         |
|        |              | IL18         |
|        |              | F2RL1        |
|        |              | PI3          |
|        |              | KLF5         |
|        |              | S100A11      |
|        |              | CDH1         |
|        |              | LGALS2       |
|        |              | S100A6       |
|        |              | C2orf15      |
|        |              | MT2A         |
|        |              | HOXB7        |
|        |              | CXCL8        |
|        |              | LRRC31       |
|        |              | SPINT1       |
|        |              | B3GNT8       |
|        |              | CHAC1        |
|        |              | HEPH         |
|        |              | TSPAN8       |
|        |              | CA4          |
|        |              | CEBPD        |
|        |              | ANXA3        |
|        |              | TFF1         |
|        |              | CXCL3        |
|        |              | C6orf48      |
|        |              | GSTA2        |
|        |              | HPN          |
|        |              | KLF11        |
|        |              | RP1-45I4.3   |
|        |              | UNC93A       |
|        |              | SLC7A11      |
|        |              | EPS8L2       |
|        |              | C4BPA        |
|        |              | SLC7A7       |
|        |              | FAM47E       |
|        |              | G0S2         |
|        |              | MAP7         |
|        |              | C19orf33     |
|        |              | FMOD         |
|        |              | IDNK         |

| Groups | FC $\geq -2$ | FC $\geq 2$ |               |
|--------|--------------|-------------|---------------|
| L-HCV  |              | HOXB9       | SOCS2         |
|        |              | CLDN7       | TXNIP         |
|        |              | SLPI        | ACE2          |
|        |              | TMEM27      | KYNU          |
|        |              | NPPB        | DBNDD2        |
|        |              | PHGR1       | RP11-452F19.3 |
|        |              | NFKBIB      | ZFAS1         |
|        |              | PXDC1       | AC007405.6    |
|        |              | CD55        |               |
